# Supplementary material for: In situgrowth of amorphous vanadium oxide nanospheres on carbon cloth as free-standing cathodes used in high performance aqueous zinc-ion batteries
Source: Royal Society of Chemistry journal article supplement (doi:10.1039/d2qi02756a), 2023-01-01
Supplement: d2qi02756a1.pdf [file d2qi02756a1.pdf]

## ***In-situ* growing amorphous vanadium oxide nanospheres on carbon cloth as free-standing cathodes toward high performance aqueous zinc-ion batteries**

Xuguang Han<sup>a, b, †</sup>, Yan Zhang<sup>a, \* †</sup>, Mengmeng Liu<sup>a</sup>, Yifei Sun<sup>a</sup>, Wenshan Gou<sup>a</sup>, Zhao Xu<sup>a</sup> and Chang Ming Li<sup>b\*</sup>

<sup>a</sup> Institute of Advanced Cross-field Science, College of Life Sciences, Qingdao University, Qingdao 11065, P. R. China.

<sup>b</sup> Institute of Materials Science and Devices, School of Materials Science and Engineering, Suzhou University of Science and Technology, Suzhou 215011, P.R. China.

† Xuguang Han and Yan Zhang contributed equally to this work.

\* Corresponding authors: [ecmli@swu.edu.cn](mailto:ecmli@swu.edu.cn); [yizhang\\_iacs@qdu.edu.cn](mailto:yizhang_iacs@qdu.edu.cn)

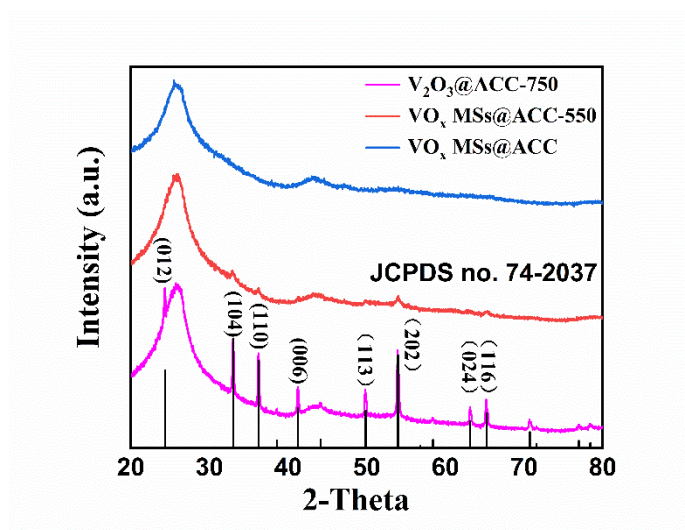

**Figure S1.** XRD patterns of the VO<sub>x</sub> compounds were obtained at different calcination temperatures (350 °C, 550 °C, 750 °C).

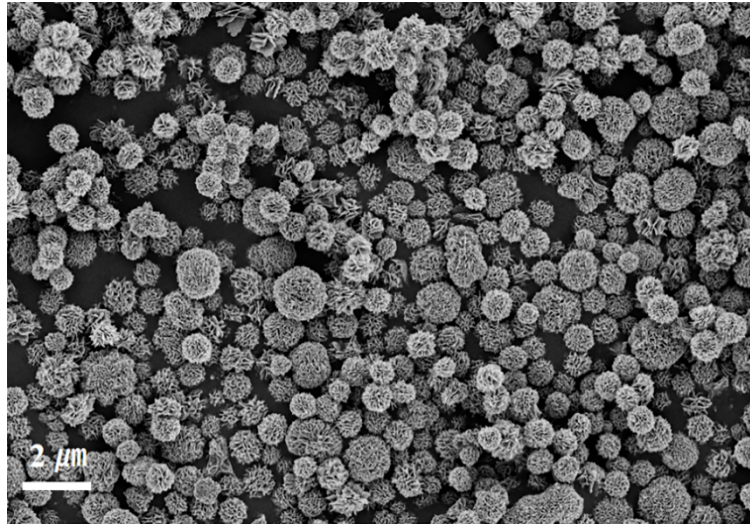

Figure S2. SEM image of the powder  $\text{VO}_x$  MSs.

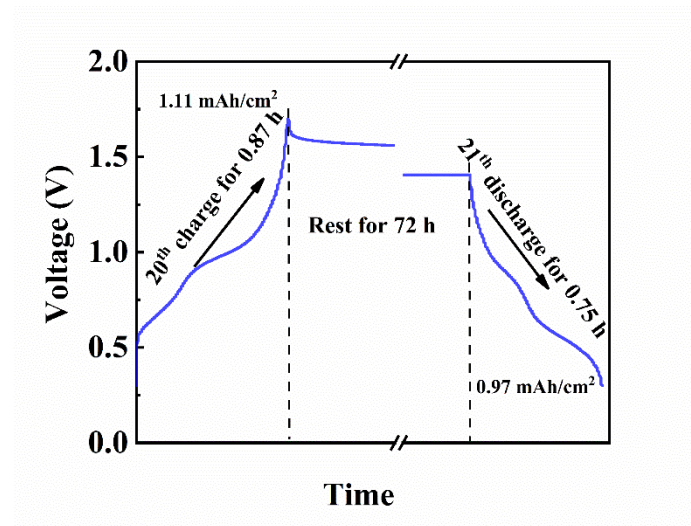

Figure S3. Self-discharge performance of  $\text{VO}_x$  MSs@ACC electrodes.

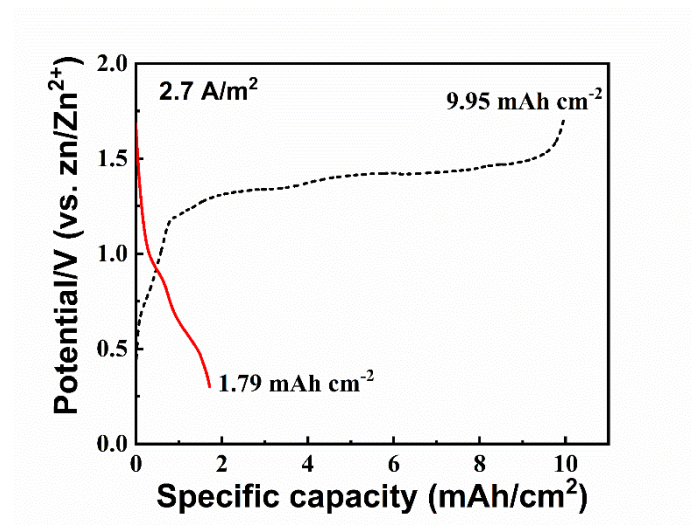

Figure S4. The galvanostatic discharge/charge profiles of the  $\text{VO}_x$  MSs@ACC at  $2.7 \text{ A m}^{-2}$  of the 1<sup>st</sup> cycle.

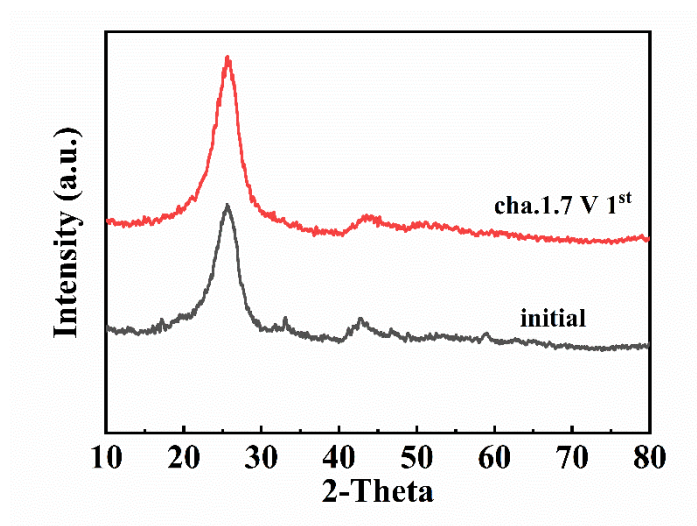

Figure S5. XRD patterns of VO<sub>x</sub> MSs@ACC electrode at the pristine state and after the 1<sup>st</sup> charge process.

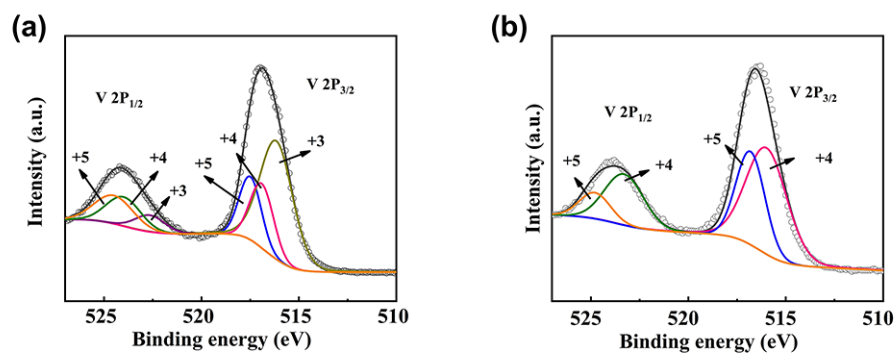

Figure S6. V 2p XPS spectra of VO<sub>x</sub> MSs@ACC electrode at pristine state (a) and after the 1<sup>st</sup> charge process (b).

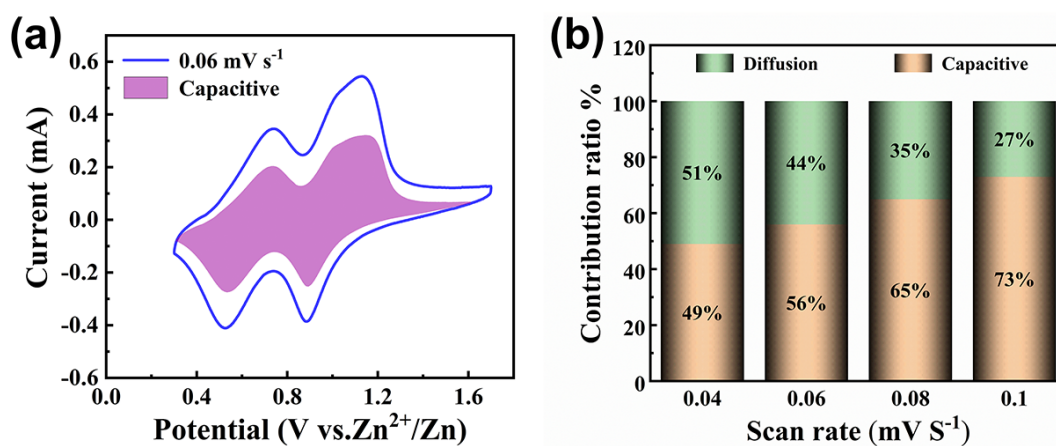

Figure S7. (a) CV profile with the capacitive contribution at 0.06 mV s<sup>-1</sup>. (b) Capacitive-diffusion contributions at various sweep rates.

**Table S1.** ICP-MS results of vanadium content of electrodes immersed in electrolytes after 3 days in the inset.

| Samples                        | V content (mg L <sup>-1</sup> ) |
|--------------------------------|---------------------------------|
| VO <sub>x</sub> MSs@ACC        | 8.09                            |
| the powder VO <sub>x</sub> MSs | 8.48                            |

**Table S2.** Comparison of the electrochemical performance at a small current density with those of the reported vanadium-based cathodes for aqueous ZIBs.

| Materials                                                                          | Cycling performance                             | Areal capacity (mAh cm <sup>-2</sup> ) | Ref.             |
|------------------------------------------------------------------------------------|-------------------------------------------------|----------------------------------------|------------------|
| NH <sub>4</sub> V <sub>3</sub> O <sub>8</sub> ·0.5H <sub>2</sub> O                 | 85% after 120 cycles at 5.4 A m <sup>-2</sup>   | 0.976                                  | 1                |
| Na <sub>3</sub> V <sub>2</sub> (PO <sub>4</sub> ) <sub>3</sub>                     | 80% after 100 cycles at 2.7 A m <sup>-2</sup>   | 0.23                                   | 2                |
| V <sub>2</sub> O <sub>x</sub> @V2CTx                                               | 81.6% after 200 cycles at 27 A m <sup>-2</sup>  | 0.89                                   | 3                |
| (NH <sub>4</sub> ) <sub>2</sub> V <sub>10</sub> O <sub>25</sub> ·8H <sub>2</sub> O | 73.2% after 100 cycles at 2.7 A m <sup>-2</sup> | 1.06                                   | 4                |
| V <sub>2</sub> O <sub>5</sub> ·nH <sub>2</sub> O/rGO-PVA                           | 28.5% after 100 cycles at 2.7 A m <sup>-2</sup> | 0.628                                  | 5                |
| Na <sub>2</sub> V <sub>6</sub> O <sub>16</sub> ·1.63H <sub>2</sub> O               | 78% after 100 cycles at 2.7 A m <sup>-2</sup>   | 0.79                                   | 6                |
| VO <sub>x</sub> MSs@ACC                                                            | 82.3% after 100 cycles at 2.7 A m <sup>-2</sup> | 1.79                                   | <b>This work</b> |

**Table S3.** Comparison of the electrochemical performance in this work with those of the recently reported vanadium oxides-based cathodes for ZIBs.

| Materials                      | Collector              | Areal capacity<br>(mAh cm <sup>-2</sup> ) | Cycling performance                                | Mass<br>Loading<br>(mg cm <sup>-2</sup> ) | Ref.                 |
|--------------------------------|------------------------|-------------------------------------------|----------------------------------------------------|-------------------------------------------|----------------------|
| V <sub>6</sub> O <sub>13</sub> | carbon cloth           | 0.446 at 10 A m <sup>-2</sup>             | 99% after 1000 cycles<br>at 243 A m <sup>-2</sup>  | 1.0                                       | 7                    |
| V <sub>6</sub> O <sub>13</sub> | carbon cloth           | 0.825 at 13.5 A m <sup>-2</sup>           | 85.3% after 1000<br>cycles at 54 A m <sup>-2</sup> | 1.5                                       | 8                    |
| CaVOH@CC                       | carbon cloth           | 1.599 at 2.7 A m <sup>-2</sup>            | 70% after 800 cycles<br>at 27 A m <sup>-2</sup>    | ~7.0                                      | 9                    |
| KNVO                           | stainless steel<br>net | 0.492 at 2.7 A m <sup>-2</sup>            | 90% after 3000 cycles<br>at 135 A m <sup>-2</sup>  | 1.2                                       | 10                   |
| CuVOH@CC                       | carbon cloth           | 1.563 at 27 A m <sup>-2</sup>             | 50% after 2000 cycles<br>at 27 A m <sup>-2</sup>   | ~7.0                                      | 11                   |
| VO <sub>x</sub> MSs@ACC        | carbon cloth           | 1.794 at 2.7 A m <sup>-2</sup>            | 80% after 2500 cycles<br>at 135 A m <sup>-2</sup>  | 2.1                                       | <b>This<br/>work</b> |

#### References:

1. H. Jiang, Y. Zhang, Z. Pan, L. Xu, J. Zheng, Z. Gao, T. Hu, C. Meng and J. Wang, NH<sub>4</sub>V<sub>3</sub>O<sub>8</sub>·0.5H<sub>2</sub>O nanobelts with intercalated water molecules as a high performance zinc ion battery cathode, *Mater. Chem. Front.* 2020, **4**, 1434-1443.
2. J. S. Ko, P. P. Paul, G. Wan, N. Seitzman, R. H. DeBlock, B. S. Dunn, M. F. Toney and J. Nelson Weker, NASICON Na<sub>3</sub>V<sub>2</sub>(PO<sub>4</sub>)<sub>3</sub> Enables Quasi-Two-Stage Na<sup>+</sup> and Zn<sup>2+</sup> Intercalation for Multivalent Zinc Batteries, *Chem. Mater.*, 2020, **32**, 3028-3035.
3. R. Venkatkarthick, N. Rodthongkum, X. Zhang, S. Wang, P. Pattanauwat, Y. Zhao, R. Liu and J. Qin, Vanadium-Based Oxide on Two-Dimensional Vanadium Carbide MXene (V<sub>2</sub>O<sub>x</sub>@V<sub>2</sub>CTx) as Cathode for Rechargeable Aqueous Zinc-Ion Batteries, *ACS Appl. Energy Mater.*, 2020, **3**, 4677-4689.
4. H. Jiang, Y. Zhang, Z. Pan, L. Xu, J. Zheng, Z. Gao, T. Hu and C. Meng, Facile hydrothermal synthesis and electrochemical properties of (NH<sub>4</sub>)<sub>2</sub>V<sub>10</sub>O<sub>25</sub>·8H<sub>2</sub>O nanobelts for high-performance aqueous zinc ion batteries, *Electrochim. Acta*, 2020, **332**, 135506.
5. J. Sun, Y. Zhang, Y. Liu, H. Jiang, X. Dong, T. Hu and C. Meng, Hydrated vanadium pentoxide/reduced graphene oxide-polyvinyl alcohol V<sub>2</sub>O<sub>5</sub>·nH<sub>2</sub>O/rGO-PVA film as a binder-free electrode for solid-state Zn-ion batteries, *J. Colloid Interface Sci.*, 2021, **587**, 845-854.
6. P. Hu, T. Zhu, X. Wang, X. Wei, M. Yan, J. Li, W. Luo, W. Yang, W. Zhang, L. Zhou, Z. Zhou and L. Mai, Highly Durable Na<sub>2</sub>V<sub>6</sub>O<sub>16</sub>·1.63H<sub>2</sub>O Nanowire Cathode for Aqueous Zinc-Ion Battery, *Nano Lett.*, 2018, **18**, 1758-1763.
7. M. Tamilselvan, T. V. M. Sreekanth, K. Yoo and J. Kim, Binder-free coaxially grown V<sub>6</sub>O<sub>13</sub> nanobelts on carbon cloth as cathodes for highly reversible aqueous zinc ion batteries, *Appl.*

Surf. Sci., 2020, **529**, 147077.

8. P. He, J. Liu, X. Zhao, Z. Ding, P. Gao and L.-Z. Fan, A three-dimensional interconnected  $V_6O_{13}$  nest with a  $V^{5+}$ -rich state for ultrahigh Zn ion storage, *J Mater. Chem. A*, 2020, **8**, 10370-10376.
9. J. Ren, P. Hong, Y. Ran, B. Wang, T. Chen and Y. Wang, High-loading and high-performance zinc ion batteries enabled by electrochemical conversion of vanadium oxide cathodes, *Electrochim. Acta*, 2022, **415**, 140265.
10. T. Zhou, H. Xiao, L. Xie, Q. Han, X. Qiu, Y. Xiao, X. Yang, L. Zhu and X. Cao, Research on the electrochemical performance of polyoxovanadate material  $K_4Na_2V_{10}O_{28}$  as a novel aqueous zinc-ion batteries cathode, *Electrochim. Acta*, 2022, **424**, 140621.
11. J. Ren, P. Hong, Y. Ran, Y. Chen, X. Xiao and Y. Wang, Binder-free three-dimensional interconnected  $CuV_2O_5 \cdot nH_2O$  nests as cathodes for high-loading aqueous zinc-ion batteries, *Inorg. Chem. Front.*, 2022, **9**, 792-804.
